# Supplementary material
Source: MDPI journal article supplement (https://www.mdpi.com/2313-0105/8/6/51)
Supplement: s1 [file s1]

# Comparison of the Properties of Ni–Mn Hydroxides/Oxides with Ni–Mn Phosphates for the Purpose of Hybrid Supercapacitors

Lyubomir Soserov<sup>1</sup>, Delyana Marinova<sup>2</sup>, Violeta Koleva<sup>2</sup>, Antonia Stoyanova<sup>1</sup>, Radostina Stoyanova<sup>2,\*</sup>

<sup>1</sup> Institute of Electrochemistry and Energy Systems, Bulgarian Academy of Sciences; l\_stefanov@iees.bas.bg (L.S.); antonia.stoyanova@iees.bas.bg (A.S.)

<sup>2</sup> Institute of General and Inorganic Chemistry, Bulgarian Academy of Sciences; mana-sieva@svr.igic.bas.bg (D.M.); vkoleva@svr.igic.bas.bg (V.K.)

\* Correspondence: radstoy@svr.igic.bas.bg; Tel.: +35-9979-3915

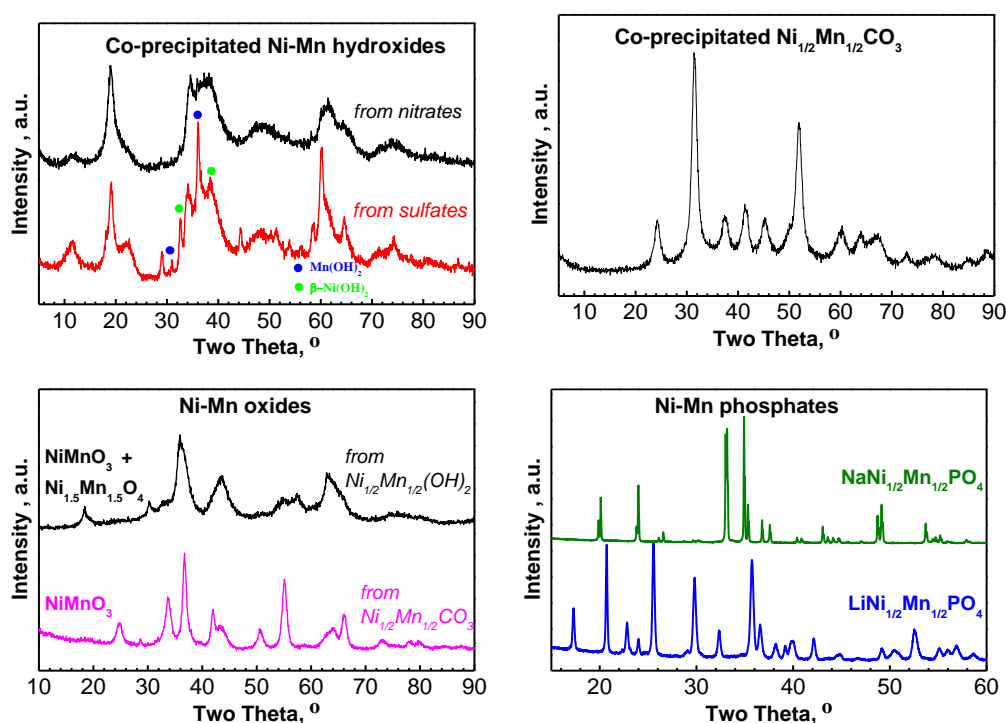

**Figure S1.** XRD patterns of Ni-Mn based mixed hydroxides, carbonate, oxides and phosphates

The XRD patterns of all samples are indexed taking into account the ICSD database.

XRD pattern of the precipitated Ni-Mn carbonate is indexed in the calcite-type structure with lattice parameters of  $a = 4.724 \text{ \AA}$ ,  $c = 15.52 \text{ \AA}$ ,  $V = 300.0 \text{ \AA}^3$ . These values are intermediate between those for  $\text{NiCO}_3$  ( $a = 4.6117 \text{ \AA}$ ,  $c = 14.735 \text{ \AA}$ ,  $V = 271.4 \text{ \AA}^3$  [1]) and  $\text{MnCO}_3$  ( $a = 4.772 \text{ \AA}$ ,  $c = 15.637 \text{ \AA}$ ,  $V = 308.4 \text{ \AA}^3$ , [2]). From the chemical analysis the Ni/Mn ratio is 0.96, so that the composition is  $\text{Ni}_{1/2}\text{Mn}_{1/2}\text{CO}_3$ .

The precipitation with nitrate salts yields a single  $\text{Ni}_{1/2}\text{Mn}_{1/2}(\text{OH})_2$  phase, that is isostructural to well-known  $\beta\text{-Ni}(\text{OH})_2$  (ICSD 28101), while a mixture between  $\alpha$ - and  $\beta$ -type  $\text{Ni}_x\text{Mn}_{1-x}(\text{OH})_2$ , as well as individual  $\text{Mn}(\text{OH})_2$  (ICSD 23591) and  $\beta\text{-Ni}(\text{OH})_2$ , is obtained when nickel and manganese sulfate salts are used (Fig. S1).

The oxide  $\text{NiMnO}_3$  prepared after the thermal decomposition of  $\text{Ni}_{1/2}\text{Mn}_{1/2}\text{CO}_3$  is characterized by an ilmenite-type of structure (ICSD 31853), while a mixture between ilmenite phase  $\text{NiMnO}_3$  and a spinel phase  $\text{Ni}_{1.5}\text{Mn}_{1.5}\text{O}_4$  is formed after decomposition of single  $\beta\text{-Ni}_{1/2}\text{Mn}_{1/2}(\text{OH})_2$  phase. The XRD pattern of the spinel phase is very similar to that of cubic  $\text{NiMn}_2\text{O}_4$  (ICSD 185294).

XRD data evidence for the formation of single phase of  $\text{LiNi}_{1/2}\text{Mn}_{1/2}\text{PO}_4$  and  $\text{NaNi}_{1/2}\text{Mn}_{1/2}\text{PO}_4$ .  $\text{LiNi}_{1/2}\text{Mn}_{1/2}\text{PO}_4$  adopts an olivine-type structure (SG  $Pnma$ ) that is characteristic for the end members,  $\text{LiMnPO}_4$  and  $\text{LiNiPO}_4$ , with lattice parameters:  $a = 10.2469(6) \text{ \AA}$ ;  $b = 5.9858(3) \text{ \AA}$ ;  $c = 4.7152(3) \text{ \AA}$ ;  $V = 289.05(3) \text{ \AA}^3$ . In contrast, sodium compound  $\text{NaNi}_{1/2}\text{Mn}_{1/2}\text{PO}_4$  is characterized by a maricite type structure (also SG  $Pnma$ ) with the following lattice parameters:  $a = 8.9233(1) \text{ \AA}$ ;  $b = 6.8207(1) \text{ \AA}$ ;  $c = 5.0744(1) \text{ \AA}$ ;  $V = 308.852(7) \text{ \AA}^3$ . It is important that for both mixed phosphates the unit-cell volume has an intermediate value between these for the corresponding end members,  $\text{Li}(\text{Na})\text{MnPO}_4$  and  $\text{Li}(\text{Na})\text{NiPO}_4$ , which confirms the formation of mixed crystals [3-6]. The olivine- and maricite type structures are closely related each other: they have the same  $\text{PO}_4$  framework, but with a reverse distribution of  $\text{M}^+$  and  $\text{M}^{2+}$  ions over the two octahedral sites ( $4a$  and  $4c$  sites). In the olivine structure Ni/Mn ions are randomly distributed on the  $4c$  octahedral sites, while in the maricite structure – on the  $4a$  crystallographic sites. To the best of our knowledge, we report the first crystallographic data for these mixed Ni-Mn based phosphate compositions.

1. F. Pertlik, Acta Crystallogr., Sec. C, 42 (1986) 4.
2. E.N. Maslen, V.A. Strel'tsov, N.R. Strel'tsova, N. Ishizawa, Acta Crystallogr. B, 51 (1995) 929-939
3. Koleva, V., Stoyanova, R., Zhecheva, E., Nano-crystalline  $\text{LiMnPO}_4$  prepared by a new phosphate-formate precursor method. *Mat. Chem. Phys.*, 2010, 121, 370-377
4. Koleva, V., Zhecheva, E., Stoyanova, R. Ordered Olivine-Type Lithium-Cobalt and Lithium-Nickel Phosphates Prepared by a New Precursor Method. *Eur. J. Inorg. Chem.* **2010**, 2010, 4091-4099.
5. Koleva, V., Boyadzhieva, T., Zhecheva, E., Nihtianova, D., Simova, S., Tyuliev, G., Stoyanova, R. Precursor-based methods for low-temperature synthesis of defectless  $\text{NaMnPO}_4$  with an olivine- and maricite-type structure. *Cryst. Eng. Comm.* **2013**, 15, 9080-9089.
6. Senthilkumar, B., Sankar, K. V, Vasylechko, L., Lee, Y.-S., Selvan, R. K. Synthesis and electrochemical performances of maricite- $\text{NaMPO}_4$  ( $\text{M} = \text{Ni, Co, Mn}$ ) electrodes for hybrid supercapacitors. *RSC Adv.* **2014**, 4, 53192-53200.
